# Supplementary material for: An Atypical Phenotype of Chronic Inflammatory Demyelinating Polyradiculoneuropathy Associated with Ocular Palsy, IgM-anti Ganglioside Antibody, and Fever-induced Recurrence
Source: PubMed Central journal article supplement — Intern Med. 2021 Oct 5;61(8):1247–52. doi: 10.2169/internalmedicine.7526-21 (PMC9107973; doi:10.2169/internalmedicine.7526-21), 2021-10-05
Supplement: 1349-7235-61-1247-s001.pdf [file 1349-7235-61-1247-s001.pdf]

**Supplemental Table 1. Results of manual muscle testing (MMT) on admission.**

| Muscle                     | Side  | MMT | Muscle                   | Side  | MMT |
|----------------------------|-------|-----|--------------------------|-------|-----|
| Biceps brachii             | Right | 5   | Iliopsoas                | Right | 5   |
|                            | Left  | 5   |                          | Left  | 5   |
| Triceps brachii            | Right | 5   | Gluteus maximus          | Right | 5   |
|                            | Left  | 5   |                          | Left  | 5   |
| Wrist extensors            | Right | 5   | Quadriceps femoris       | Right | 5   |
|                            | Left  | 4   |                          | Left  | 5   |
| Wrist flexors              | Right | 5   | Hamstrings               | Right | 4   |
|                            | Left  | 5   |                          | Left  | 5-  |
| Extensor digitorum         | Right | 5-  | Tibialis Anterior        | Right | 3   |
|                            | Left  | 5-  |                          | Left  | 3-  |
| Flexor digitorum profundus | Right | 5   | Gastrocnemius            | Right | 3-  |
|                            | Left  | 5   |                          | Left  | 3-  |
| Abductor pollicis brevis   | Right | 5   | Extensor hallucis longus | Right | 4   |
|                            | Left  | 5   |                          | Left  | 3   |
| First dorsal interossei    | Right | 5-  |                          |       |     |
|                            | Left  | 5-  |                          |       |     |
| Abductor digiti minimi     | Right | 4   |                          |       |     |
|                            | Left  | 4   |                          |       |     |
